# Supplementary material for: Covalent organic frameworks with triazine units for iodine capture via weak molecular interactions
Source: Royal Society of Chemistry journal article supplement (doi:10.1039/d3nj00197k), 2023-01-01
Supplement: d3nj00197k1.pdf [file d3nj00197k1.pdf]

## **Supplementary Information**

### **Covalent Organic Frameworks with Triazine Units for Iodine Capture via Weak Molecular Interaction**

Qianyuan Niu,<sup>a</sup> Qingxue Cui,<sup>a</sup> Xutong Meng,<sup>a</sup> Pei Zhang,<sup>a</sup> Yining Zhou,<sup>a</sup> Hao Fu,<sup>a</sup> Baiwei Ma,<sup>a,\*</sup> Na Qin<sup>a,\*</sup> and Lipeng Zhai<sup>a</sup>

<sup>a</sup>Henan Key Laboratory of Functional Salt Materials, Center for Advanced Materials Research, Zhongyuan University of Technology, Zhengzhou, 450007 P. R. China.

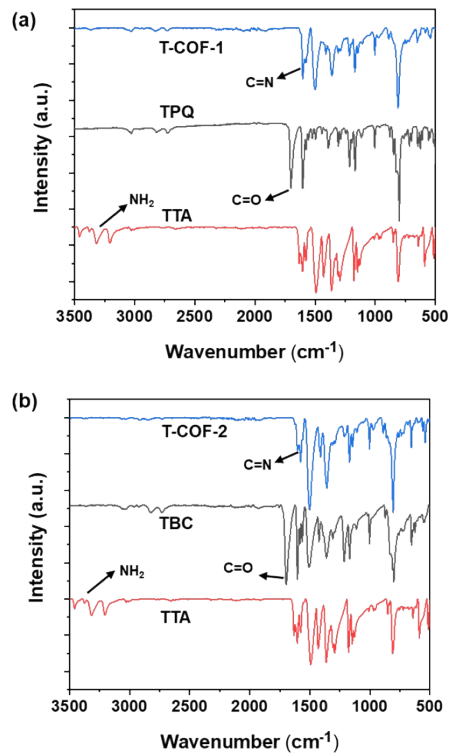

**Fig. S1.** FT IR spectra of (a) T-COF-1 and (b) T-COF-2.

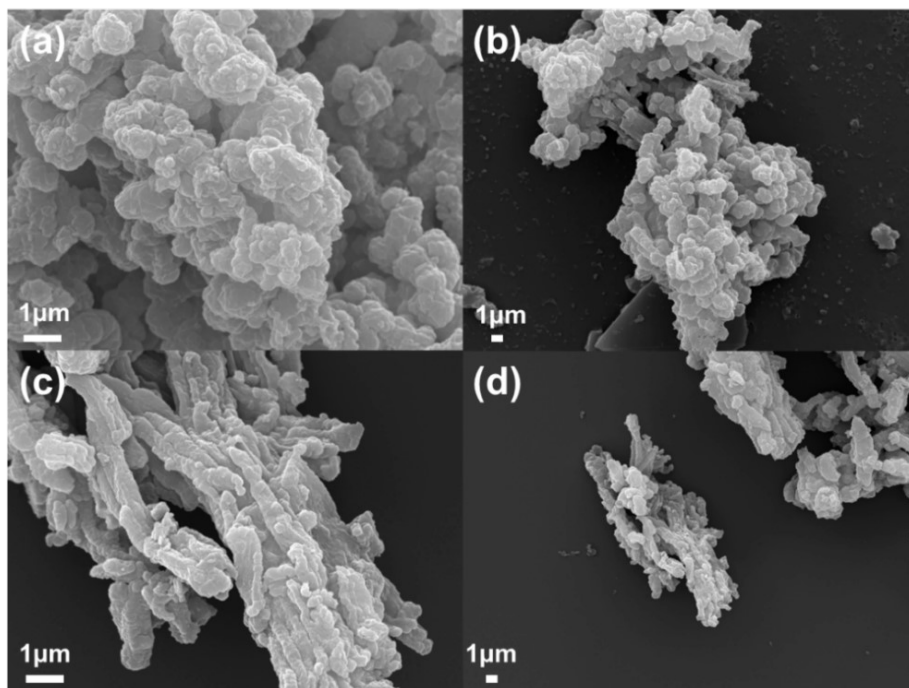

**Fig. S2.** FE SEM images of (a) (b) T-COF-1 and (c) (d) T-COF-2.

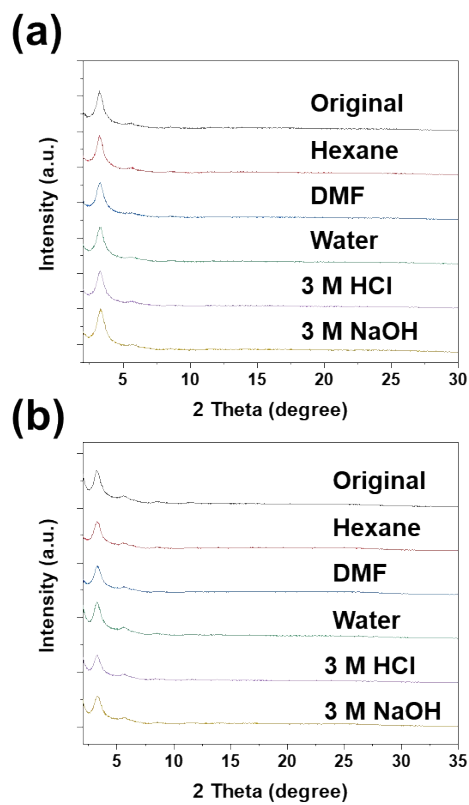

**Fig. S3.** PXRD patterns of (a) T-COF-1 and (b) T-COF-2 under different conditions.

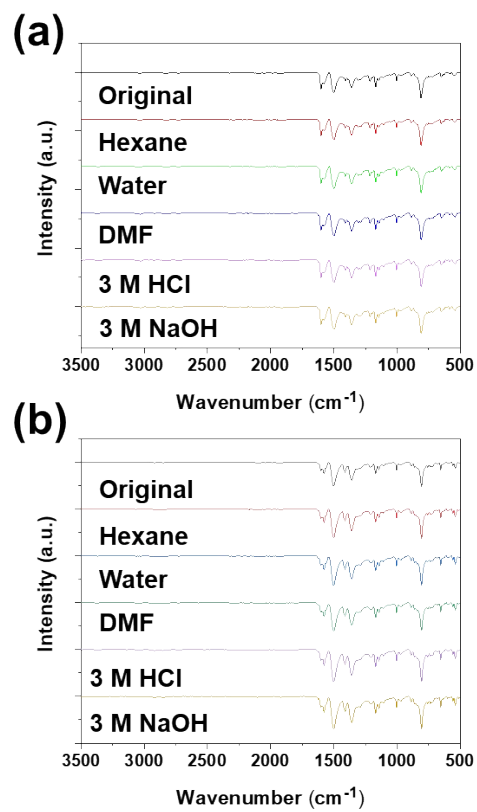

**Fig. S4.** FT IR patterns of (a) T-COF-1 and (b) T-COF-2 under different conditions.



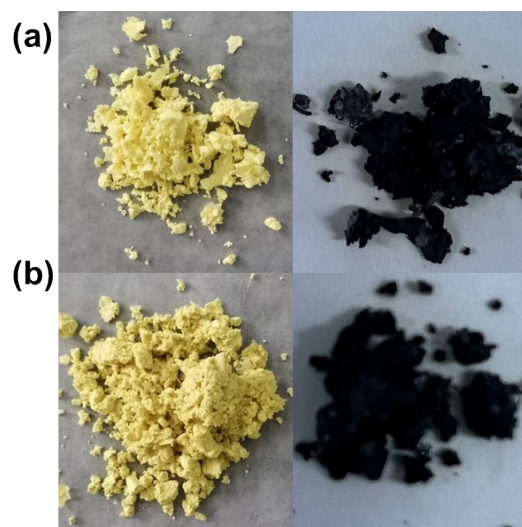

**Fig. S5.** The images of COFs before and after iodine capture: (a) T-COF-1 and (b) T-COF-2.

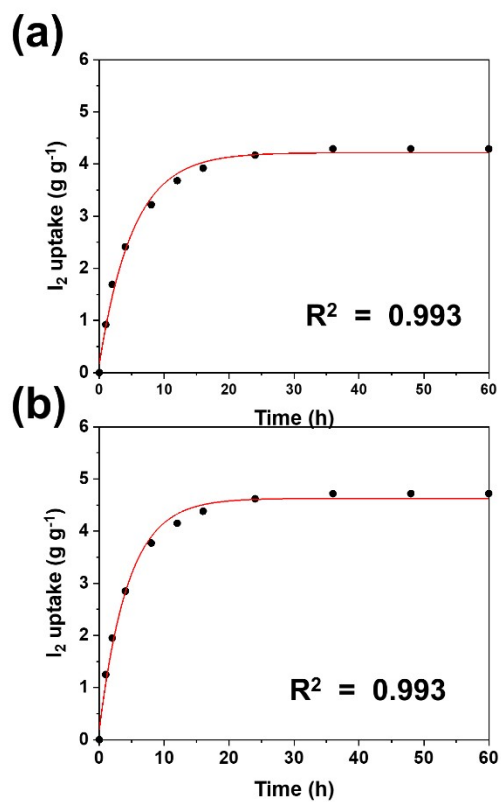

**Fig. S6.** The pseudo-first-order kinetic model of (c) T-COF-1 and (d) T-COF-2.

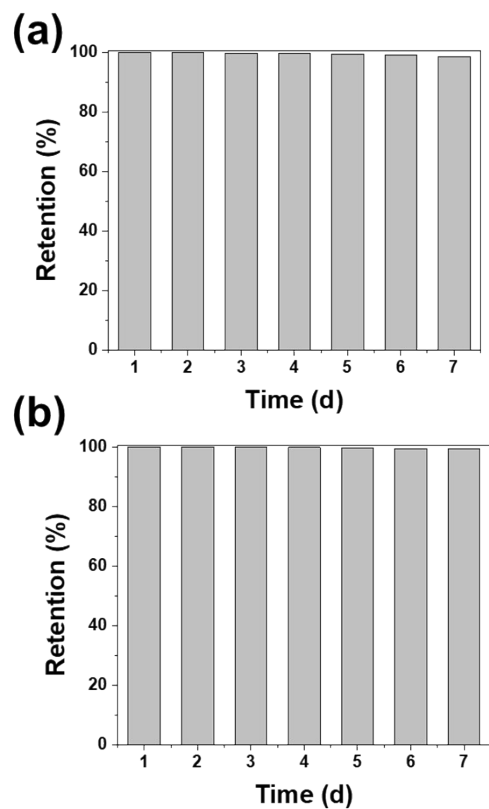

**Fig. S7.** Retention ability of (a) T-COF-1 and (b) T-COF-2.

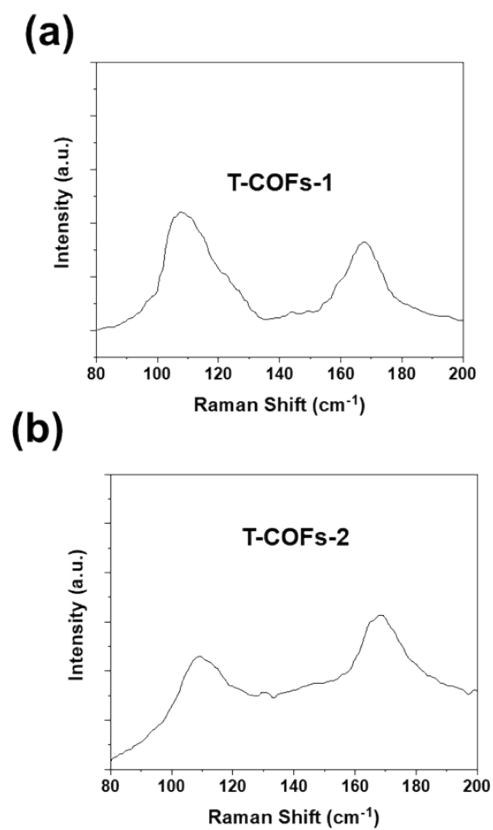

**Fig. S8.** Raman spectra of (a) T-COF-1 and (b) T-COF-2.

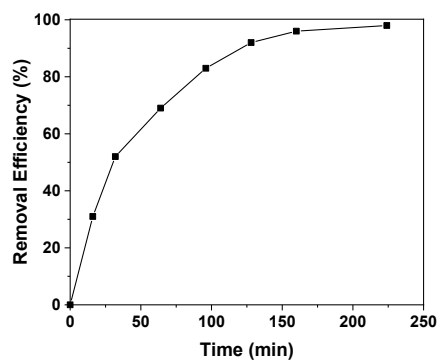

**Fig. S9.** Iodine uptake of T-COF-2 (15 mg) in hexane (iodine: 1.5 mmol L<sup>-1</sup>, 3 mL).

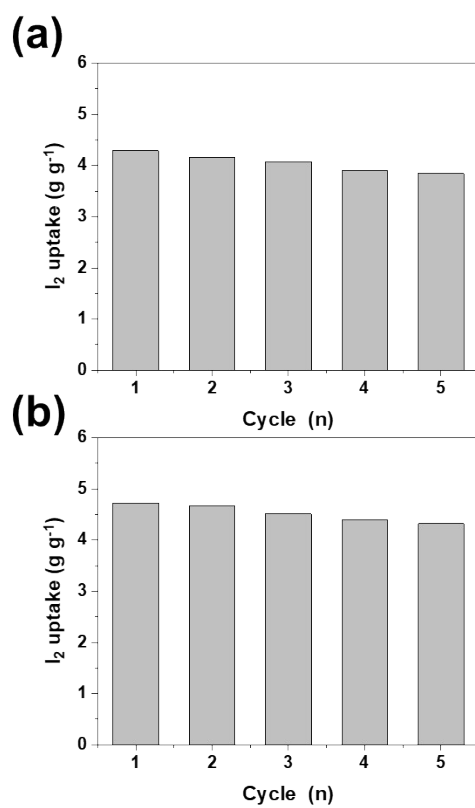

**Fig. S10.** Recycle ability of (a) T-COF-1 and (b) T-COF-2.

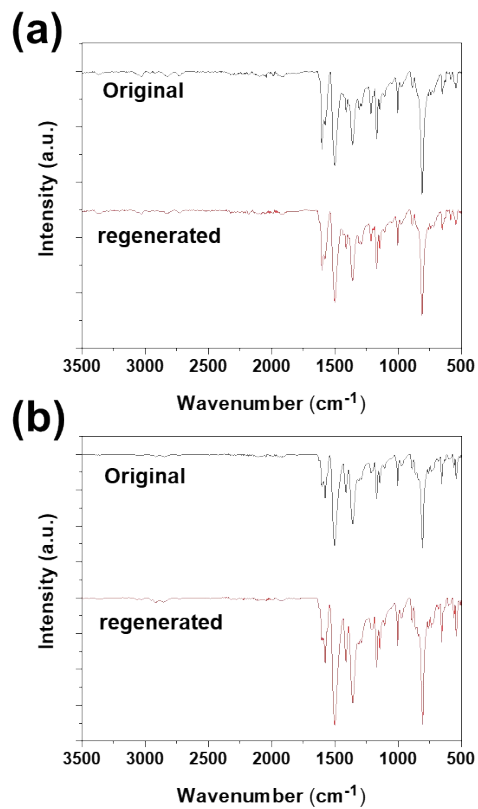

**Fig. S11.** FT IR spectra of (a) T-COF-1 and (b) T-COF-2.

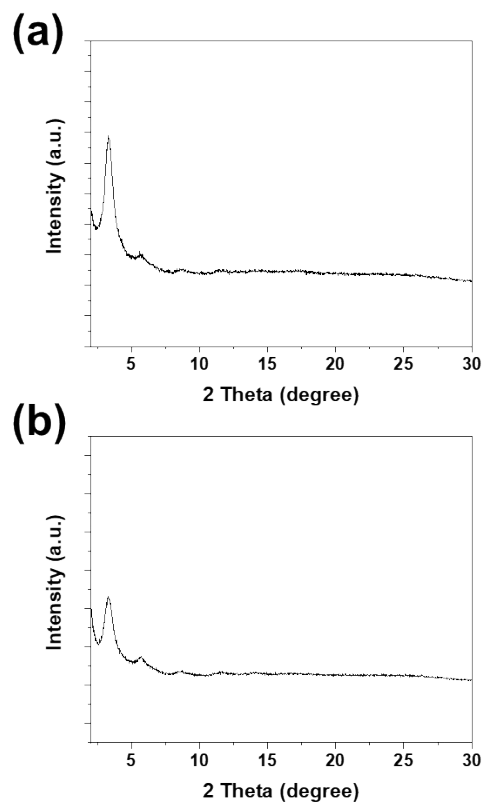

**Fig. S12.** PXRD patterns of regenerated (a) T-COF-1 and (b) T-COF-2.



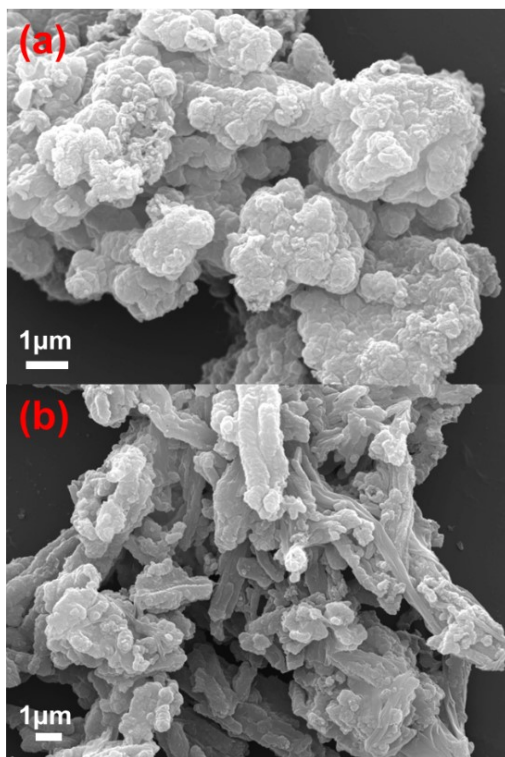

**Fig. S13.** FE SEM images of regenerated (a) T-COF-1 and (b) T-COF-2.

**Table S1.** Elemental analysis of T-COF-1 and T-COF-2.

|         |        | C (%) | H (%) | N (%) |
|---------|--------|-------|-------|-------|
| T-COF-1 | Calcd. | 86.79 | 4.40  | 8.81  |
|         | Found  | 86.01 | 4.92  | 8.16  |
| T-COF-2 | Calcd. | 82.76 | 4.08  | 13.16 |
|         | Found  | 81.23 | 4.52  | 13.06 |

**Table S2.** Iodine sorption capacity compared with other materials.

| Samples       | Temperature (°C) | I <sub>2</sub> uptake (g g <sup>-1</sup> ) | Rate constant | Ref.      |
|---------------|------------------|--------------------------------------------|---------------|-----------|
| T-COF-1       | 77               | 4.29                                       |               | This work |
| T-COF-2       |                  | 4.72                                       |               |           |
| TPB-DMTP COF  | 75               | 6.26                                       | 0.13          | S1        |
| TTA-TTB COF   |                  | 4.95                                       | 0.14          |           |
| ETTA-TPA COF  |                  | 4.79                                       | 0.12          |           |
| M-COF         | 77               | 4.56                                       | -             | S2        |
| TPT-DHBD-COF  | 75               | 5.43                                       | 0.14          | S3        |
| TPT-Azine-COF | -                | 2.19                                       | -             | S4        |
| SOF           | -                | 4.46                                       | -             | S5        |
| AzoPPN        | 77               | 2.90                                       | 0.18          | S6        |
| NTP           | 75               | 1.80                                       | 0.11          | S7        |
| NiP-CMP       | 75               | 2.02                                       | 0.17          | S8        |

## References

- S1. P. Wang, Q. Xu, Z. Li, W. Jiang, Q. Jiang, D. Jiang, *Adv. Mater.*, 2018, **30**, 1801991.
- S2. W. Zhang, X. Yang, L. Zhai, Z. Chen, Q. Sun, X. Luo, J. Wan, R. Nie, Z. Li, *Mater. Lett.*, 2021, **304**, 130657.
- S3. X. Guo, Y. Tian, M. Zhang, Y. Li, R. Wen, X. Li, X. Li, Y. Xue, L. Ma, C. Xia, S. Li, *Chem. Mater.*, 2018, **30**, 2299-2308.
- S4. Y. Li, W. Chen, W. Hao, Y. Li, L. Chen, *ACS Appl. Nano Mater.*, 2018, **1**, 4756.
- S5. S. Song, Y. Shi, N. Liu, F. Liu, *ACS Appl. Mater. Interfaces*, 2021, **13**, 10513-10523.
- S6. L. Ascherl, T. Sick, J. T. Margraf, S. H. Lapidus, M. Calik, C. Hettstedt, K. Karaghiosoff, M. Döblinger, T. Clark, K. W. Chapman, F. Auras, T. Bein, *Nat. Chem.*, 2016, **8**, 310.
- S7. H. Ma, J. Chen, L. Tan, J. Bu, Y. Zhu, B. Tan, C. Zhang, *ACS Macro Lett.*, 2016, **5**, 1039.
- S8. S. A, Y. Zhang, Z. Li, H. Xia, M. Xue, X. Liu, Y. Mu, *Chem. Comm.*, 2014, **50**, 8495.
